# Supplementary material for: Comparing DXA and MRI body composition measurements in cross-sectional and longitudinal cohorts
Source: bioRxiv or medRxiv preprint supplement (doi:10.1101/2024.12.12.24318943), 2024-12-13
Supplement: Supplementary file [file media-1.pdf]

## Comparing DXA to MRI for body composition measurements at population scale - Supplementary Material

### Supplementary Tables

|                                         | Baseline imaging visit      |                     |                       | Follow-up imaging visit    |                  |                    |
|-----------------------------------------|-----------------------------|---------------------|-----------------------|----------------------------|------------------|--------------------|
|                                         | Full Cohort<br>(N = 31,033) | Men<br>(N = 14,743) | Women<br>(N = 15,711) | Full Cohort<br>(N = 1,928) | Men<br>(N = 993) | Women<br>(N = 935) |
| <b>White (n)</b>                        | 29,858                      | 14,419              | 15,306                | 1,875                      | 961              | 881                |
| <b>Age (yrs.)</b>                       | 64.17 ± 7.75                | 64.88 ± 7.84        | 63.52 ± 7.61          | 65.21 ± 7.22               | 65.68 ± 7.20     | 64.80 ± 7.17       |
| <b>Weight (kg)</b>                      | 76.00 ± 15.09               | 83.48 ± 13.13       | 68.71 ± 12.73         | 75.57 ± 14.69              | 82.54 ± 12.91    | 67.44 ± 11.90      |
| <b>Height (m)</b>                       | 169.23 ± 9.29               | 176.12 ± 6.66       | 162.75 ± 6.26         | 169.82 ± 9.46              | 176.50 ± 6.80    | 162.68 ± 6.13      |
| <b>BMI (kg/m<sup>2</sup>)</b>           | 26.45 ± 4.35                | 26.89 ± 3.82        | 25.94 ± 4.61          | 26.12 ± 4.21               | 26.48 ± 3.76     | 25.48 ± 4.31       |
| <b>Waist circumference (cm)</b>         | 87.65 ± 12.62               | 93.61 ± 10.46       | 81.85 ± 11.51         | 87.93 ± 12.08              | 93.15 ± 10.29    | 81.81 ± 10.78      |
| <b>Hip circumference (cm)</b>           | 100.37 ± 8.67               | 100.25 ± 7.17       | 100.33 ± 9.63         | 99.57 ± 8.17               | 99.39 ± 7.00     | 99.23 ± 8.69       |
| <b>WHR</b>                              | 0.87 ± 0.09                 | 0.93 ± 0.06         | 0.81 ± 0.07           | 0.88 ± 0.09                | 0.94 ± 0.06      | 0.82 ± 0.07        |
| <b>Systolic blood pressure (mmHg)</b>   | 138.35 ± 18.57              | 141.51 ± 17.35      | 135.34 ± 19.17        | 139.93 ± 17.99             | 142.58 ± 16.87   | 136.99 ± 18.56     |
| <b>Diastolic blood pressure (mmHg)</b>  | 78.57 ± 10.03               | 80.41 ± 9.80        | 76.80 ± 9.93          | 78.85 ± 9.78               | 80.71 ± 9.74     | 76.85 ± 9.46       |
| <b>Dominant hand grip strength (kg)</b> | 31.13 ± 10.63               | 38.73 ± 8.99        | 23.94 ± 6.07          | 28.40 ± 10.58              | 35.21 ± 9.24     | 21.08 ± 6.12       |

Table S1: Demographics of the full cohort, separated by sex. Values are reported as mean ± standard deviation for continuous variables and counts (N) for categorical variables.

|                                    | Men (N = 992) |               |                |                     | Women (N = 903) |               |                |                     |
|------------------------------------|---------------|---------------|----------------|---------------------|-----------------|---------------|----------------|---------------------|
| Android Region                     | MRI           | DXA           | R <sup>2</sup> | Regression equation | MRI             | DXA           | R <sup>2</sup> | Regression equation |
| Muscle mass (kg)                   | 1.60 ± 0.27   | -             | -              | -                   | 0.97 ± 0.16     | -             | -              | -                   |
| Lean mass (kg)                     | 1.75 ± 0.30   | 4.11 ± 0.53   | 0.542          | y = 1.3x + 1.85     | 1.09 ± 0.22     | 2.92 ± 0.38   | 0.375          | y = 1.05x + 1.78    |
| Fat mass (kg)                      | 2.70 ± 1.10   | 2.57 ± 1.21   | 0.956          | y = 1.07x - 0.33    | 2.27 ± 1.01     | 2.12 ± 1.09   | 0.966          | y = 1.06x - 0.28    |
| Fat percentage (%)                 | 51.93 ± 11.32 | 36.70 ± 10.35 | not linear     | not linear          | 55.61 ± 12.53   | 39.67 ± 11.50 | not linear     | not linear          |
| Visceral adipose tissue volume (l) | 1.97 ± 0.96   | 1.73 ± 1.05   | 0.908          | y = 1.04x - 0.32    | 1.04 ± 0.59     | 0.78 ± 0.62   | 0.89           | y = 0.98x - 0.24    |
|                                    | Men (N = 993) |               |                |                     | Women (N = 935) |               |                |                     |
| Gynoid Region                      | MRI           | DXA           | R <sup>2</sup> | Regression equation | MRI             | DXA           | R <sup>2</sup> | Regression equation |
| Muscle mass (kg)                   | 6.02 ± 0.96   | -             | -              | -                   | 3.96 ± 0.61     | -             | -              | -                   |
| Lean mass (kg)                     | 7.76 ± 1.12   | 8.55 ± 1.07   | 0.781          | y = 0.84x + 2.01    | 5.27 ± 0.84     | 6.06 ± 0.76   | 0.61           | y = 0.7x + 2.37     |
| Fat mass (kg)                      | 3.61 ± 1.12   | 3.46 ± 1.19   | 0.96           | y = 1.04x - 0.3     | 4.52 ± 1.30     | 4.54 ± 1.54   | 0.921          | y = 1.13x - 0.59    |
| Fat percentage (%)                 | 37.97 ± 7.00  | 28.26 ± 5.98  | not linear     | not linear          | 53.56 ± 6.61    | 41.87 ± 6.76  | not linear     | not linear          |

Table S2: Body composition measured via DXA and MRI at the follow-up imaging visit separated by sex within android and gynoid regions.  $N_{\text{Android}} = 1,895$ .  $N_{\text{Gynoid}} = 1,928$ . Android muscle mass was not available from DXA measures, so the regression was done between DXA lean mass and MRI muscle mass. After Bonferroni correction ( $p = 0.00094$ ), all the linear regression coefficients were statistically significant.

## Supplementary Figures

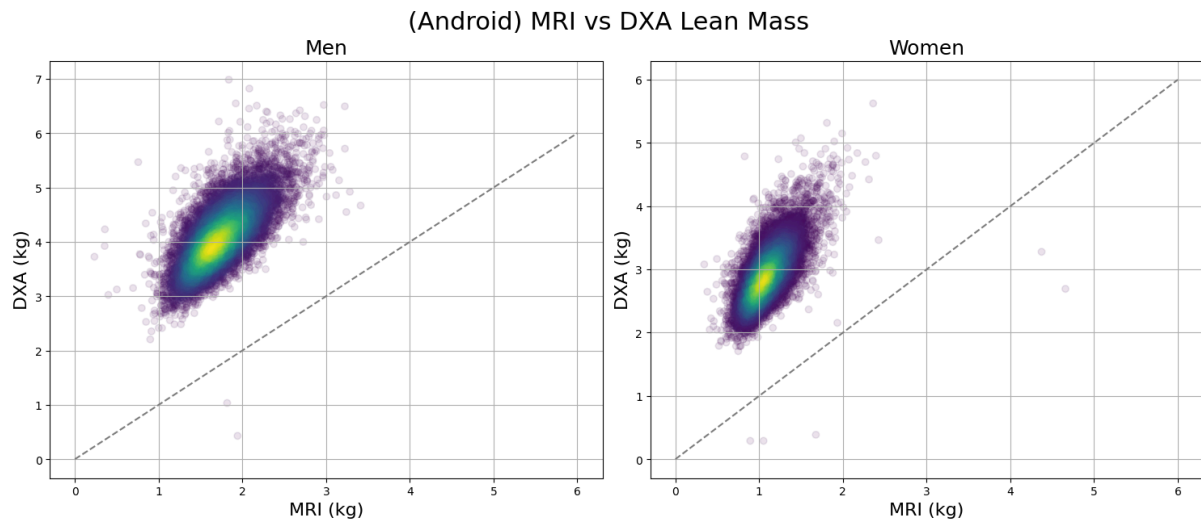

Figure S1: Scatterplots of DXA (y-axis) by MRI (x-axis) android lean mass (kg), separated by sex.

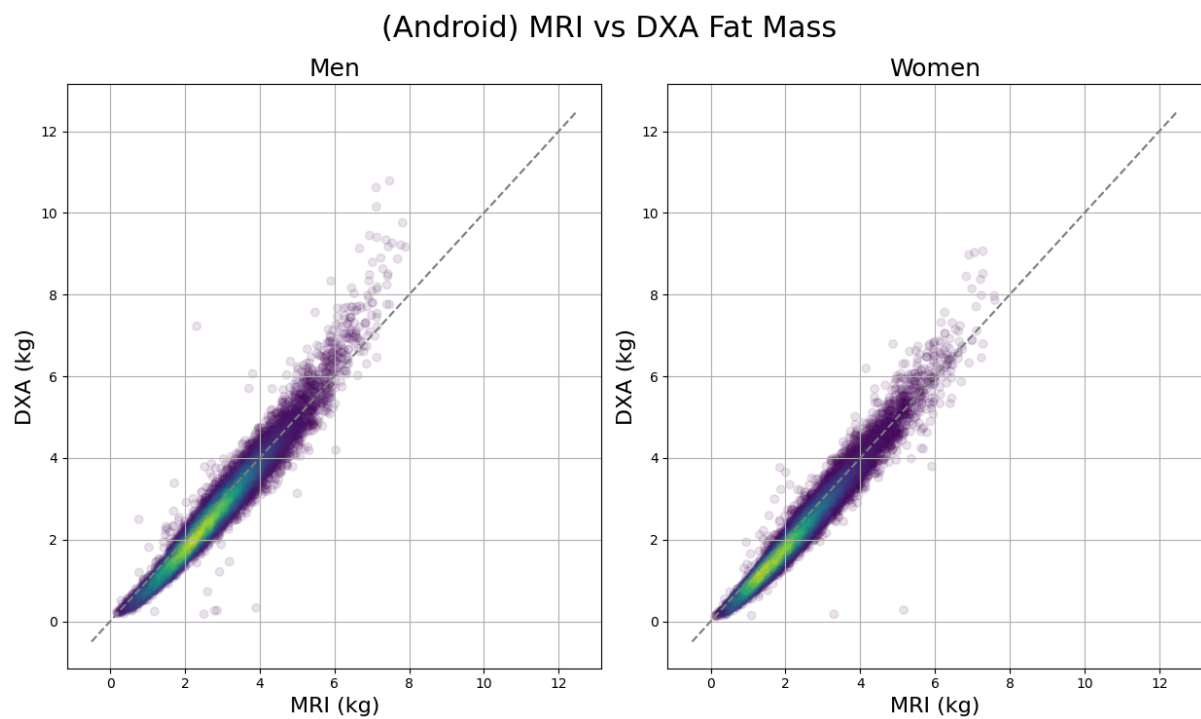

Figure S2: Scatterplots of DXA (y-axis) by MRI (x-axis) android fat mass (kg), separated by sex.

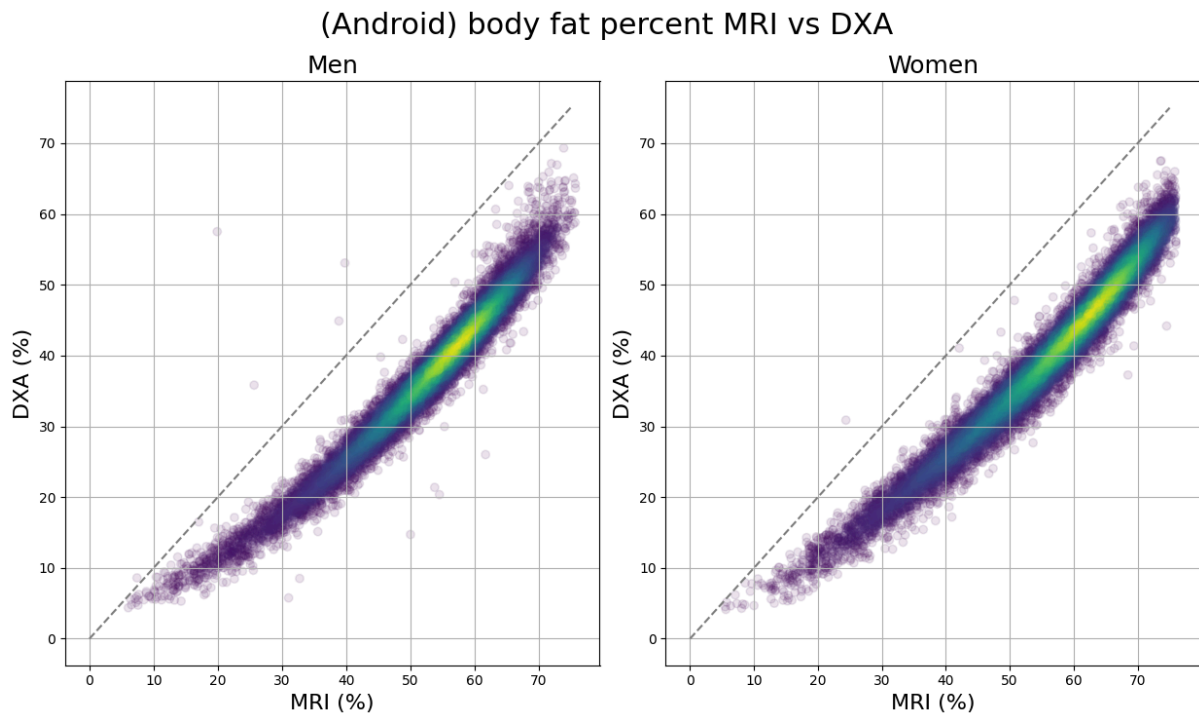

Figure S3: Scatterplots of DXA (y-axis) by MRI (x-axis) android fat percent (%), separated by sex.

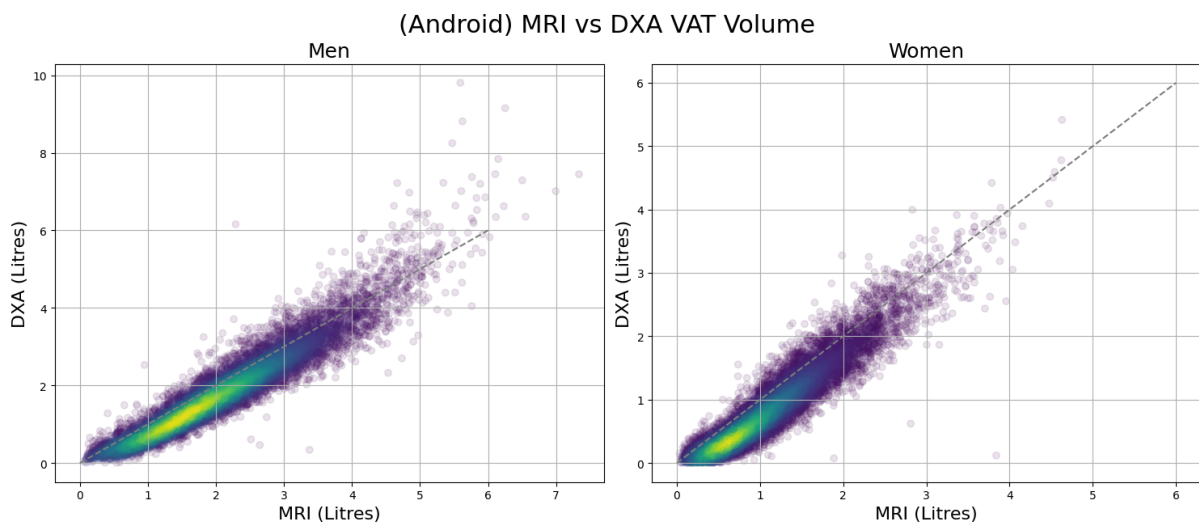

Figure S4: Scatterplots of DXA (y-axis) by MRI (x-axis) android visceral adipose tissue (VAT) volume (litres), separated by sex.

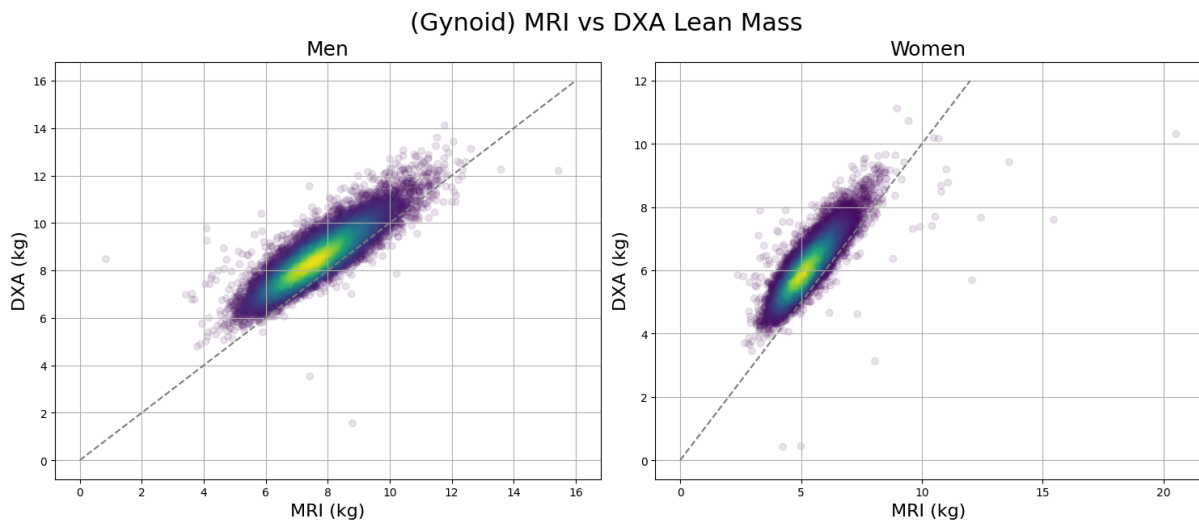

Figure S5: Scatterplots of DXA (y-axis) by MRI (x-axis) gynoid lean mass (kg), separated by sex.

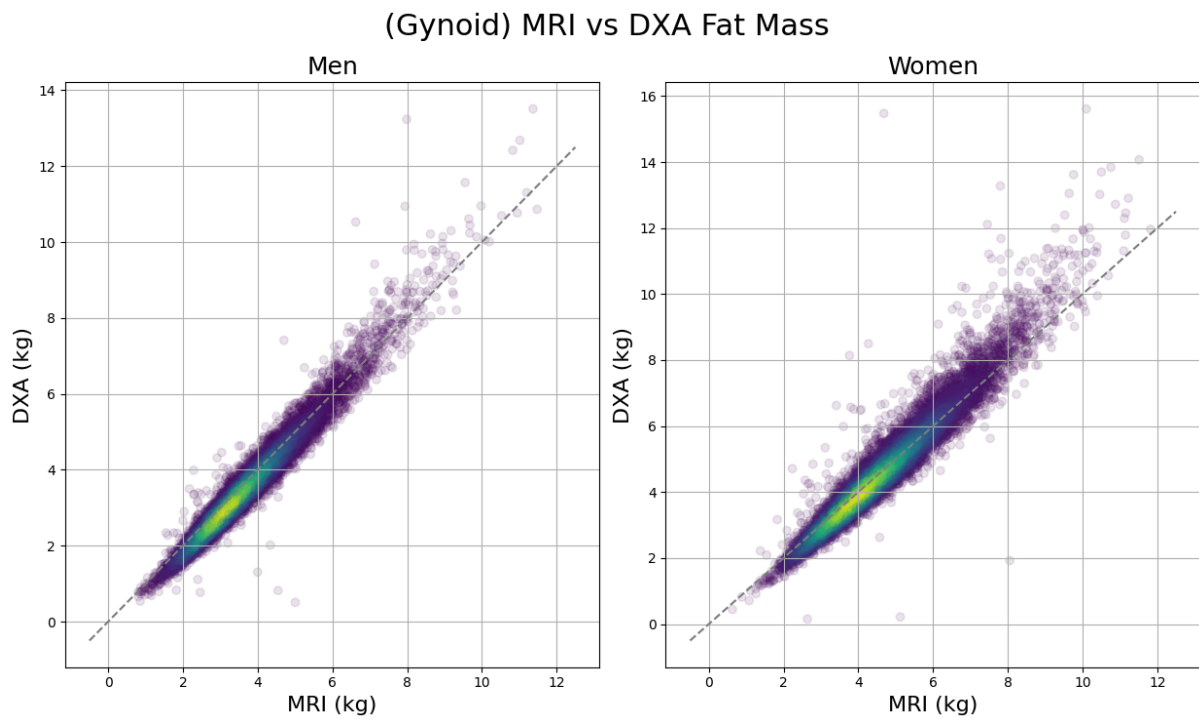

Figure S6: Scatterplots of DXA (y-axis) by MRI (x-axis) gynoid fat mass (kg), separated by sex.

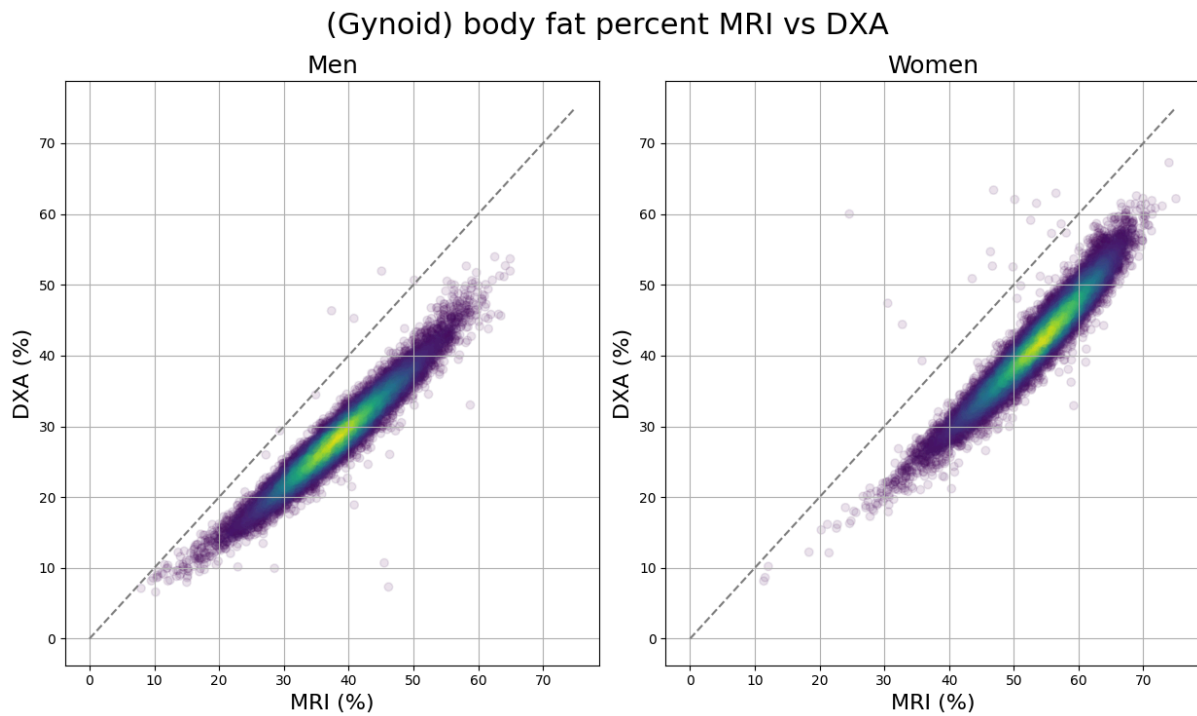

Figure S7: Scatterplots of DXA (y-axis) by MRI (x-axis) gynoid fat percentage (%), separated by sex.

**a** Baseline 1.21L "lean", 1L Muscle

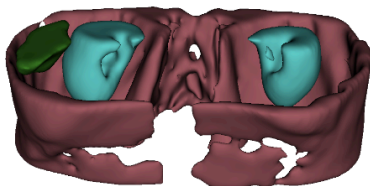

**c** Re-imaging 1.06L "lean", 0.99L Muscle

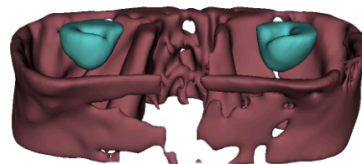

**b** Baseline 0.21L Non-muscle tissue

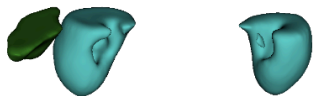

**d** Baseline 0.07L Non-muscle tissue

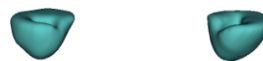

Figure S8: Example of MRI android lean tissue including abdominal organs and muscle at baseline (a,b) and follow-up (c,d) imaging visit for one participant. The figure demonstrates a 12.4% decrease in lean tissue when including the liver and kidneys, but only a 1% decrease when these organs are omitted, highlighting the impact of different breath holds on anatomy captured within the android region.
